# Supplementary material for: Functional and behavioral effects of de novo mutations in calcium-related genes in patients with bipolar disorder
Source: PubMed Central journal article supplement (PMC8444452; doi:10.1093/hmg/ddab152), 2021-06-07
Supplement: supplementary_figure-legends_ddab152.pdf [file supplementary_figure-legends_ddab152.pdf]

**Supplementary Figure 1.** Episode measurements in wheel running test. For all panels, data shown are the mean  $\pm$  standard error of the mean (SEM). The Kruskal-Wallis test was used for comparisons.  $n = 15$  for each group. A, Number of depressive episodes of female mice in 18 weeks.  $p = 0.92$ . Effect size, WT vs *Ehd1* mutant;  $r = 0.073$ , WT vs *Macf1* mutant;  $r = 0.024$ . B, Number of hyperactive episodes of female mice in 18 weeks.  $p = 0.72$ . Effect size, WT vs. *Ehd1* mutant;  $r = 0.075$ , WT vs. *Macf1* mutant;  $r = 0.15$ . C, Number of depressive episodes of male mice in 18 weeks.  $p = 0.99$ . Effect size, WT vs. *Ehd1* mutant;  $r = 0.020$ , WT vs *Macf1* mutant;  $r = 0.020$ . D. Number of hyperactive episodes of male mice in 18 weeks.  $p = 0.18$ . Effect size, WT vs. *Ehd1* mutant;  $r = 0.28$ , WT vs. *Macf1* mutant;  $r = 0.015$ .

**Supplementary Figure 2.** Activity in light-phase in a wheel running test of male mice. A, There was no significance of the activities in light-phase. The test was performed for 18 weeks. Data shown are the mean  $\pm$  standard error of the mean (SEM). The Kruskal-Wallis test was used for comparisons.  $n = 15$  for each group.  $p = 0.86$ . Effect size, WT vs *Ehd1* mutant;  $r = 0.038$ , WT vs *Macf1* mutant;  $r = 0.099$ . B, Representative actogram showing daily activity of each male mouse. Each row means the data of one day. The X-axis indicates local time. Y-axis of each row shows the wheel running activity per 10 min.

**Supplementary Figure 3.** Results of IntelliCage of male *Ehd1* mutant mice. For all panels, data shown are the mean  $\pm$  standard error of the mean (SEM). Two-way repeated measures analysis of variance (rmANOVA) was used for comparisons in A, B, E, and F. Two-way ANOVA was used for comparisons in C and D. A, Place learning test.  $n = 7$  for each group. Interaction;  $p = 0.81$ . Time;  $p < 0.0001$ . Genotype;  $p = 0.42$ . Effect size, Interaction;  $\eta^2 = 0.012$ , Time;  $\eta^2 = 0.37$ , Genotype;  $\eta^2 = 0.029$ . B, Place learning reversal test.  $n = 7$  for each group. Interaction;  $p = 0.075$ . Time;  $p < 0.0001$ . Genotype;  $p = 0.88$ . Effect size, Interaction;  $\eta^2 = 0.042$ , Time;  $\eta^2 = 0.42$ , Genotype;  $\eta^2 =$

0.0011. C, Impulsivity test.  $n = 7$  for each group. Interaction;  $p = 0.94$ . Pattern;  $p < 0.0001$ . Genotype;  $p > 0.99$ . Effect size, Interaction;  $\eta^2 = 0.00021$ , Pattern;  $\eta^2 = 0.94$ , Genotype;  $\eta^2 = 7.53E-16$ . D, Attention test.  $n = 7$  for each group. Interaction;  $p = 0.70$ . Stimulation;  $p < 0.0001$ . Genotype;  $p = 0.64$ . Effect size, Interaction;  $\eta^2 = 0.010$ , Stimulation;  $\eta^2 = 0.47$ , Genotype;  $\eta^2 = 0.0032$ . E, Place avoidance test.  $n = 7$  for each group. Interaction;  $p = 0.16$ . Time;  $p < 0.0001$ . Genotype;  $p = 0.45$ . Effect size, Interaction;  $\eta^2 = 0.048$ , Time;  $\eta^2 = 0.36$ , Genotype;  $\eta^2 = 0.017$ . F, Delay discounting test. WT;  $n = 6$ , Mut;  $n = 5$ . Interaction;  $p > 0.99$ . Time;  $p = 0.0022$ . Genotype;  $p = 0.71$ . Effect size, Interaction;  $\eta^2 = 0.0064$ , Time;  $\eta^2 = 0.16$ , Genotype;  $\eta^2 = 0.0071$ .

**Supplementary Figure 4.** Results of IntelliCage of female *Ehd1* mutant mice. For all panels, data shown are the mean  $\pm$  standard error of the mean (SEM). Two-way repeated measures analysis of variance (rmANOVA) was used for comparisons in A, B, E, and F. Two-way ANOVA was used for comparisons in C and D. A, Place learning test.  $n = 7$  for each group. Interaction;  $p = 0.76$ . Time;  $p < 0.0001$ . Genotype;  $p = 0.80$ . Effect size, Interaction;  $\eta^2 = 0.0092$ , Time;  $\eta^2 = 0.36$ , Genotype;  $\eta^2 = 0.0038$ . B, Place learning reversal test.  $n = 7$  for each group. Interaction;  $p = 0.11$ . Time;  $p < 0.0001$ . Genotype;  $p = 0.97$ . Effect size, Interaction;  $\eta^2 = 0.034$ , Time;  $\eta^2 = 0.55$ , Genotype;  $\eta^2 = 8.19E-5$ . C, Impulsivity test.  $n = 7$  for each group. Interaction;  $p = 0.84$ . Pattern;  $p < 0.0001$ . Genotype;  $p > 0.99$ . Effect size, Interaction;  $\eta^2 = 0.0028$ , Pattern;  $\eta^2 = 0.71$ , Genotype;  $\eta^2 = 1.13E-15$ . D, Attention test.  $n = 7$  for each group. Interaction;  $p = 0.90$ . Stimulation;  $p < 0.0001$ . Genotype;  $p = 0.49$ . Effect size, Interaction;  $\eta^2 = 0.0022$ , Stimulation;  $\eta^2 = 0.61$ , Genotype;  $\eta^2 = 0.0051$ . E, Place avoidance test.  $n = 7$  for each group. Interaction;  $p = 0.84$ . Time;  $p = 0.90$ . Genotype;  $p = 0.47$ . Effect size, Interaction;  $\eta^2 = 0.019$ , Time;  $\eta^2 = 0.016$ , Genotype;  $\eta^2 = 0.025$ . F, Delay discounting test. WT;  $n = 7$ , Mut;  $n = 5$ . Interaction;  $p = 0.94$ . Time;  $p < 0.0001$ . Genotype;  $p = 0.87$ . Effect size, Interaction;  $\eta^2 = 0.014$ , Time;  $\eta^2 = 0.21$ , Genotype;  $\eta^2 = 0.0015$ .

**Supplementary Figure 5.** Results of IntelliCage of male *Macfl* mutant mice. For all panels, data shown are the mean  $\pm$  standard error of the mean (SEM). Two-way repeated measures analysis of variance (rmANOVA) was used for comparisons in A, B, D, and E. Two-way ANOVA was used for comparisons in C. A, Place learning test.  $n = 7$  for each group. Interaction;  $p = 0.25$ . Time;  $p < 0.0001$ . Genotype;  $p = 0.17$ . Effect size, Interaction;  $\eta^2 = 0.023$ , Time;  $\eta^2 = 0.56$ , Genotype;  $\eta^2 = 0.031$ . B, Place learning reversal test.  $n = 7$  for each group. Interaction;  $p = 0.29$ . Time;  $p < 0.0001$ . Genotype;  $p = 0.74$ . Effect size, Interaction;  $\eta^2 = 0.040$ , Time;  $\eta^2 = 0.34$ , Genotype;  $\eta^2 = 0.0023$ . C, Impulsivity test.  $n = 7$  for each group. Interaction;  $p = 0.10$ . Pattern;  $p < 0.0001$ . Genotype;  $p > 0.99$ . Effect size, Interaction;  $\eta^2 = 0.0011$ , Pattern;  $\eta^2 = 0.92$ , Genotype;  $\eta^2 = 5.39E-16$ . D, Place avoidance test.  $n = 7$  for each group. Interaction;  $p = 0.50$ . Time;  $p < 0.0001$ . Genotype;  $p = 0.67$ . Effect size, Interaction;  $\eta^2 = 0.027$ , Time;  $\eta^2 = 0.12$ , Genotype;  $\eta^2 = 0.0080$ . E, Delay discounting test.  $n = 7$  for each group. Interaction;  $p = 0.061$ . Time;  $p = 0.0001$ . Genotype;  $p = 0.66$ . Effect size, Interaction;  $\eta^2 = 0.038$ , Time;  $\eta^2 = 0.53$ , Genotype;  $\eta^2 = 0.0038$ .

**Supplementary Figure 6.** Results of IntelliCage of female *Macfl* mutant mice. For all panels, data shown are the mean  $\pm$  standard error of the mean (SEM). Two-way repeated measures analysis of variance (rmANOVA) was used for comparisons in A, B, and E. Two-way ANOVA was used for comparisons in C and D. A, Place learning test.  $n = 7$  for each group. Interaction;  $p = 0.88$ . Time;  $p < 0.0001$ . Genotype;  $p = 0.074$ . Effect size, Interaction;  $\eta^2 = 0.0092$ , Time;  $\eta^2 = 0.28$ , Genotype;  $\eta^2 = 0.10$ . B, Place learning reversal test.  $n = 7$  for each group. Interaction;  $p = 0.80$ . Time;  $p < 0.0001$ . Genotype;  $p = 0.078$ . Effect size, Interaction;  $\eta^2 = 0.011$ , Time;  $\eta^2 = 0.40$ , Genotype;  $\eta^2 = 0.066$ . C, Impulsivity test.  $n = 7$  for each group. Interaction;  $p = 0.23$ . Pattern;  $p < 0.0001$ . Genotype;  $p > 0.99$ . Effect size, Interaction;  $\eta^2 = 0.014$ ,

Pattern;  $\eta^2 = 0.82$ , Genotype;  $\eta^2 = 3.16E-16$ . D, Attention test.  $n = 7$  for each group. Interaction;  $p = 0.66$ . Stimulation;  $p < 0.0001$ . Genotype;  $p = 0.25$ . Effect size, Interaction;  $\eta^2 = 0.011$ , Stimulation;  $\eta^2 = 0.49$ , Genotype;  $\eta^2 = 0.018$ . E, Place avoidance test.  $n = 7$  for each group. Interaction;  $p = 0.44$ . Time;  $p < 0.0001$ . Genotype;  $p = 0.12$ . Effect size, Interaction;  $\eta^2 = 0.021$ , Time;  $\eta^2 = 0.17$ , Genotype;  $\eta^2 = 0.10$ .
