# Supplementary material for: Functional and behavioral effects of de novo mutations in calcium-related genes in patients with bipolar disorder
Source: PubMed Central journal article supplement (PMC8444452; doi:10.1093/hmg/ddab152), 2021-06-07
Supplement: supplementary_tables_ddab152.pdf [file supplementary_tables_ddab152.pdf]

**Supplementary table 1.** Schedule of IntelliCage analysis

| <b>Session name</b>                   | <b>Days</b> |
|---------------------------------------|-------------|
| <b>Free adaptation</b>                | 2           |
| <b>Nose poke adaptation</b>           | 3           |
| <b>Drinking session adaptation</b>    | 3           |
| <b>Place preference test</b>          | 7           |
| <b>Place preference reversal test</b> | 5           |
| <b>Impulsivity test</b>               | 4           |
| <b>Attention test</b>                 | 5           |
| <b>Place avoidance test</b>           | 9           |
| <b>Delay discounting test</b>         | 10          |

**Supplementary table 2.** Primer sets in this study.

A. Primer sets for sgRNA (5'->3')

|              | top                       | bottom                    |
|--------------|---------------------------|---------------------------|
| <i>Macf1</i> | CACCGGTAGGTCTCGTGCCTGCAA  | AAACTTGCAGGACACGAGACCTACC |
| <i>Ehd1</i>  | CACCGGGACTTCACCATCTCCTTCT | AAACAGAAGGAGATGGTGAAGTCC  |

B. ssODN for knock-in of mutations (5'->3')

|              |                                                                                                                                  |
|--------------|----------------------------------------------------------------------------------------------------------------------------------|
| <i>Macf1</i> | TGATGCCACTGACAGATAAATCACTCTGAGAAGCAGGCATTATGGGAGCCTTGCAGG<br>ACGACGAGACCTACATGGGTAGGCTCTGTGTGAATAGGGTCTCCTGACTGTTTTGGTA<br>TTGAT |
| <i>Ehd1</i>  | TTCTACACACTGTCTCCTGTCAACGGCAAGATCACAGGTGCTAATGCTAAGAA<br>GGAGATGTGAAGTCCAAGCTGCCAACACAGTGCTGGGGAAGATCTGGAAGT<br>TGGCAGATGTGGACA  |

C. Genotyping primers

|              | Fw                        | Rv                        | PCR conditions                                       |
|--------------|---------------------------|---------------------------|------------------------------------------------------|
| <i>Macf1</i> | CAGGTAAAGGAGAGCTTCCAAGCAG | CACACTCCACTTCGATATGCCTGAG | 94°C, 1 min →<br>(98°C, 10 sec → 68°C, 1<br>min) ×30 |
| <i>Ehd1</i>  | CAGACCCAGGACTTCAGCAAGTTCC | GGATGAGTGTGGGGCTGTCAGACAG |                                                      |

D. Sequencing primers for genotyping

|              | 5'->3'                       |
|--------------|------------------------------|
| <i>Macf1</i> | CCTCTGAAACAGTAGATCAAGACCAACC |
| <i>Ehd1</i>  | CCTCCGTTTGGAGGGTGGGAATGAG    |
